# Supplementary material for: Anthropogenic amplification of biogenic secondary organic aerosol production
Source: Copernicus journal article supplement (doi:10.5194/acp-23-8993-2023), 2023-08-11
Supplement: Supplementary file 1 [file acp-23-8993-2023-supplement.pdf]

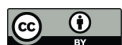

*Supplement of*

## **Anthropogenic amplification of biogenic secondary organic aerosol production**

**Yiqi Zheng et al.**

*Correspondence to:* Yiqi Zheng (zhengyiqi1989@gmail.com) and Jingqiu Mao (jmao2@alaska.edu)

The copyright of individual parts of the supplement might differ from the article licence.

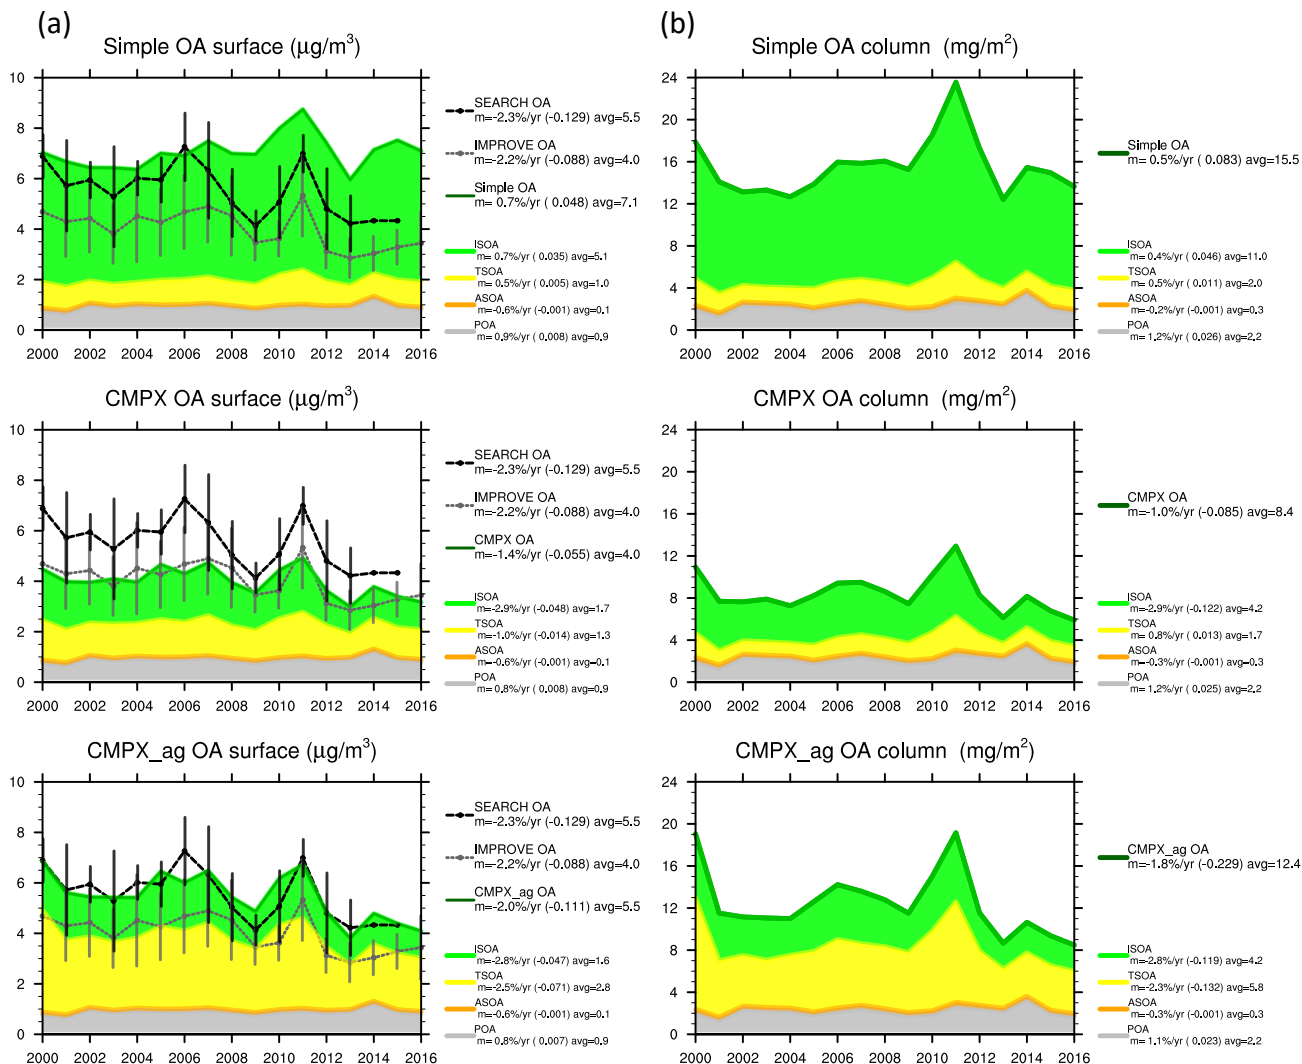

**Figure S1.** Summertime **(a)** surface and **(b)** column concentrations of OA in the SEUS. Color shades represent OA components from each scheme. In attached text, “m” represents 2000-2016 relative trend with units of %/year; numbers in parenthesis in (a) and (b) represent trends with units of  $\mu\text{g}/\text{m}^3/\text{year}$  or  $\text{mg}/\text{m}^2/\text{year}$ ; “avg” represents the 17-year average with units of  $\mu\text{g}/\text{m}^3$  in (a) and  $\text{mg}/\text{m}^2$  in (b).

(a) Monthly OA from observation and AM4.1 simulations

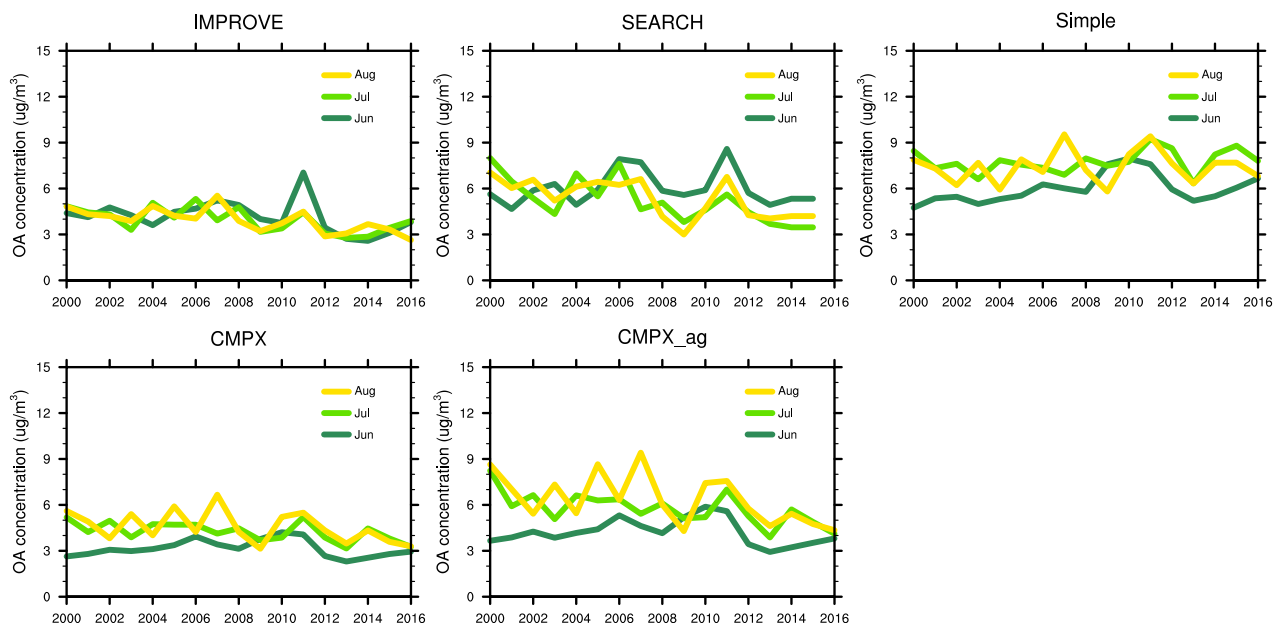

(b) Monthly OA from GEOS-Chem v12.1.1

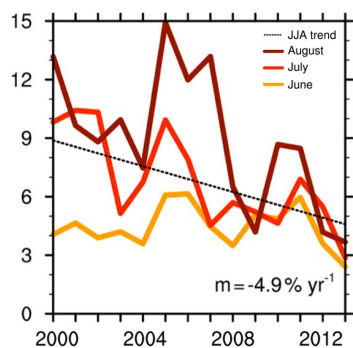

(c) Jun-Jul-Aug standard deviation of OA

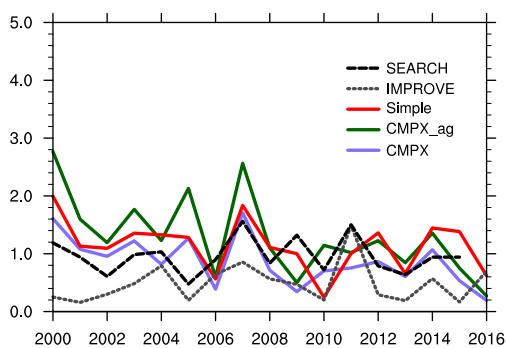

**Figure S2.** Summertime monthly surface OA ( $\mu\text{g}/\text{m}^3$ ) in the SEUS from **(a)** IMPROVE, SEARCH and all GFDL AM4.1 simulations; and **(b)** from GEOS-Chem v12.1.1. (b) is adapted from Zheng et al. (2020). **(c)** The standard deviation of surface OA ( $\mu\text{g}/\text{m}^3$ ) among June, July and August in the SEUS from IMPROVE, SEARCH, and all GFDL AM4.1 simulations.

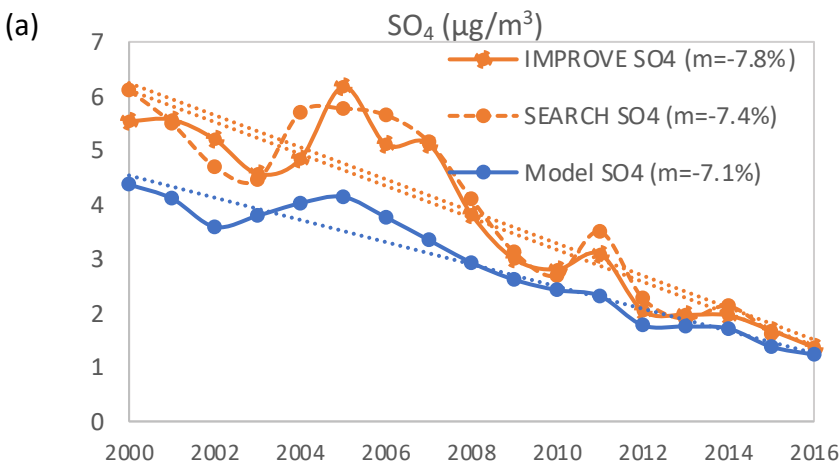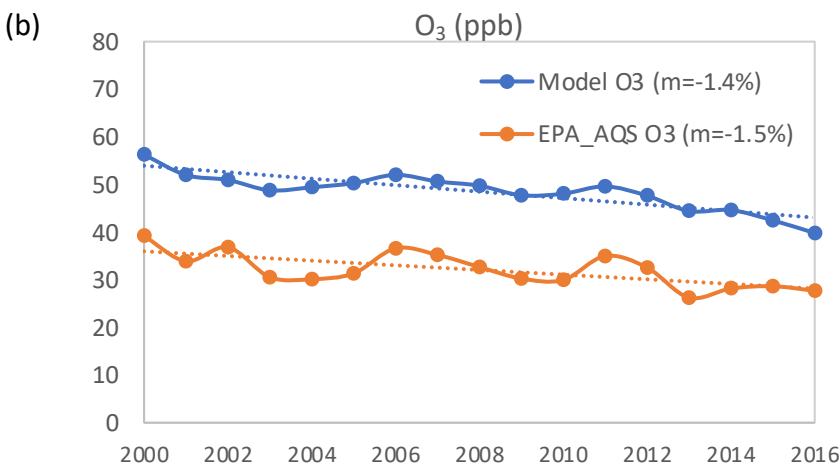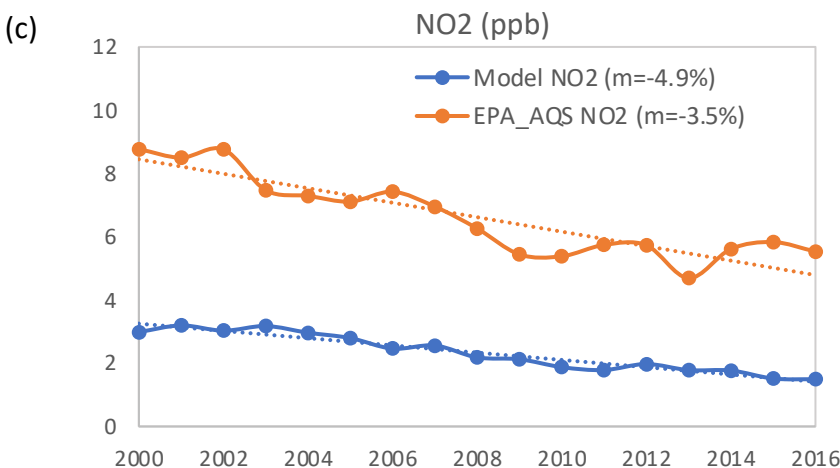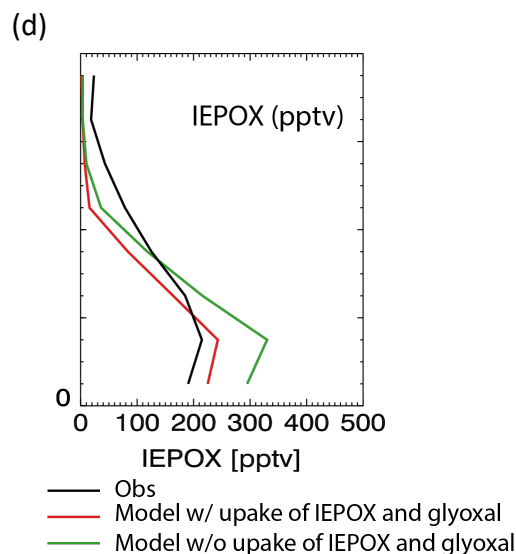

**Figure S3.** Summertime modeled and measured surface **(a) sulfate** ( $\mu\text{g}/\text{m}^3$ ) and **(b)  $\text{O}_3$**  (ppb) and **(c)  $\text{NO}_2$**  (ppb) concentrations in the SEUS. Changing rates  $m$  have units of % per year relative to their 2000-2016 averages. Model results are from the CMPX\_ag scheme. Sulfate measurements are from IMPROVE and SEARCH.  $\text{O}_3$  and  $\text{NO}_2$  measurements are from EPA's Air Quality System ([https://aq5.epa.gov/aqsweb/airdata/download\\_files.html](https://aq5.epa.gov/aqsweb/airdata/download_files.html)). **(d)** Mean vertical profile of IEPOX during the NASA SEAC<sup>4</sup>RS aircraft campaign. Measurements are shown in black, and two model simulations (using a previous version AM3) with and without aerosol reactive uptake of IEPOX and glyoxal, respectively.



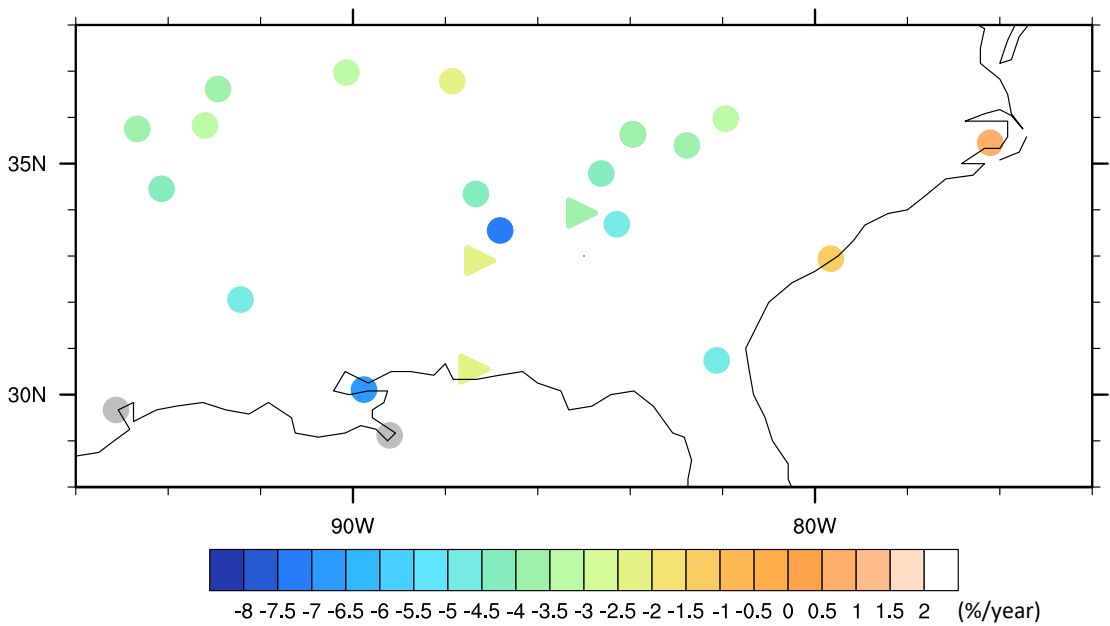

**Figure S4.** Relative trend of OA (units: %/year) for each site from the IMPROVE (circle) and SEARCH (triangle) networks. Grey points represent sites which have less than 5 years' data.

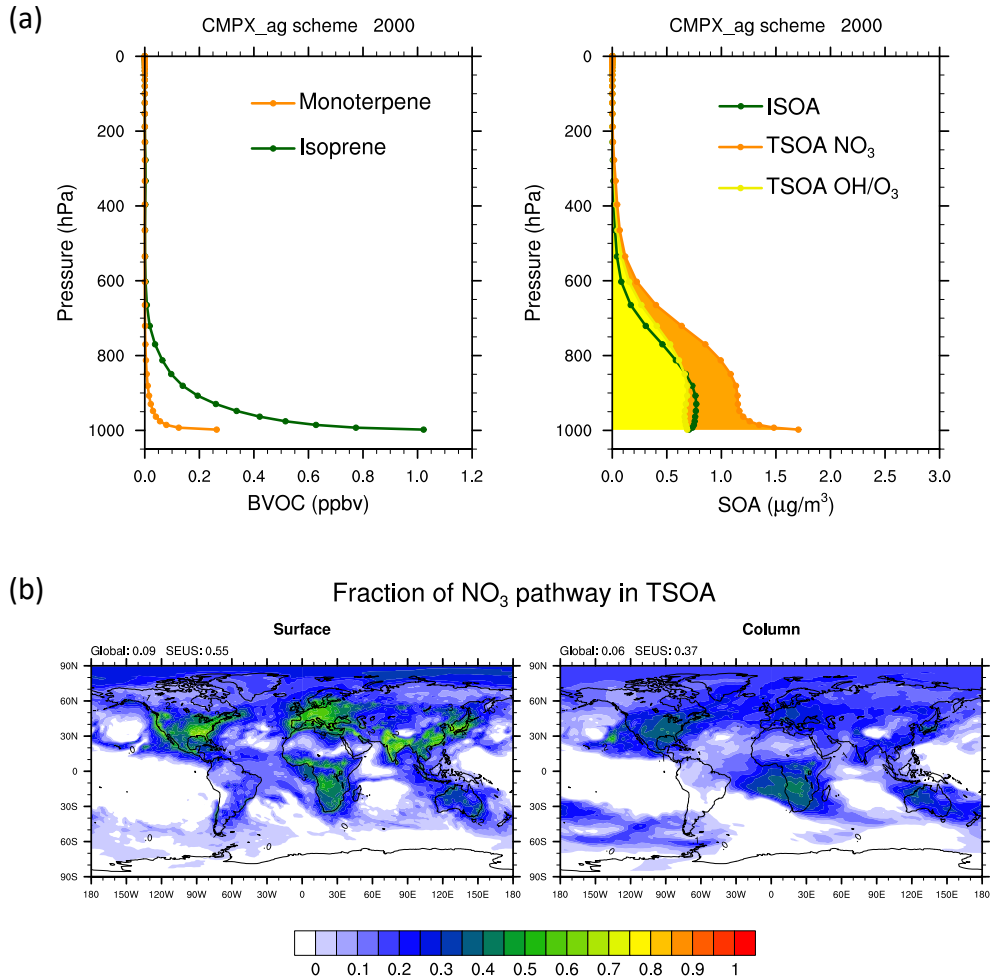

**Figure S5.** (a) Vertical profile of isoprene, monoterpene, ISOA and TSOA concentrations in the SEUS, and (b) fraction of the  $\text{NO}_3$ -pathway in TSOA surface and column concentrations in a 1-year test run in 2000 using CMPX\_ag. TSOA formed by  $\text{NO}_3$ -oxidation is determined by the difference between the CMPX\_ag simulation and a sensitivity run that turns off the  $\text{NO}_3$ -pathway.

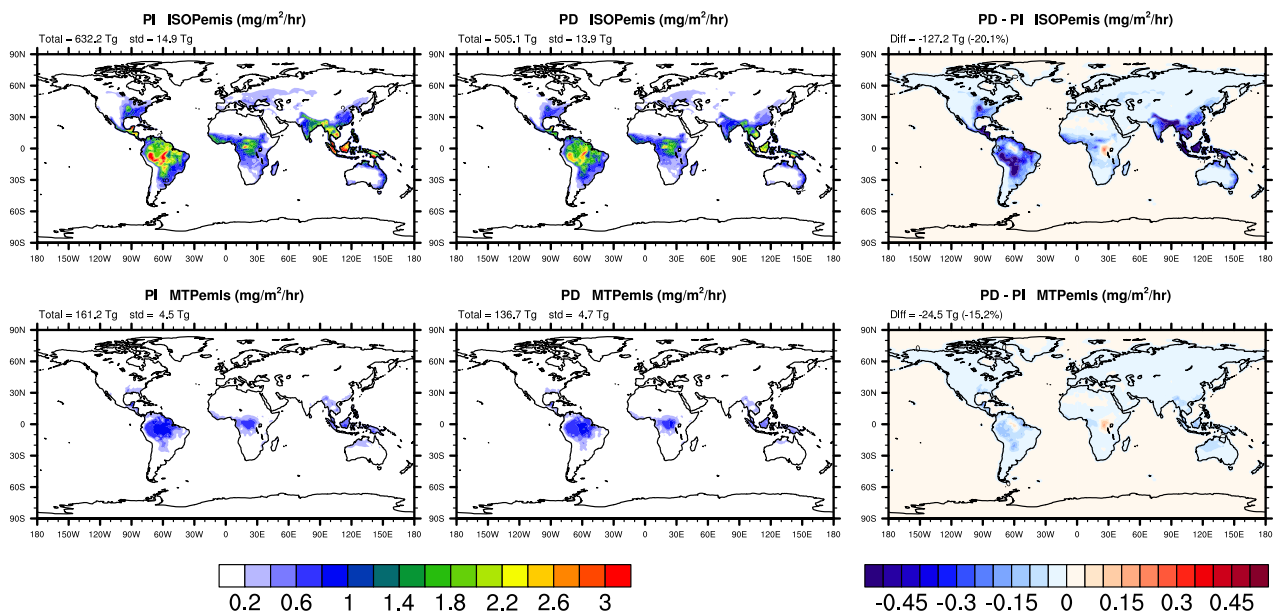

**Figure S6.** Annual mean isoprene (ISOP) and monoterpene (MTP) emissions ( $\text{mg}/\text{m}^2/\text{hour}$ ) at pre-industrial (PI) and present day (PD) and their difference. The global total emissions ( $\text{Tg}/\text{year}$ ) are listed at the top left of each panel. The BVOC emissions using the Simple, CMPX, and CMPX\_ag schemes are similar.

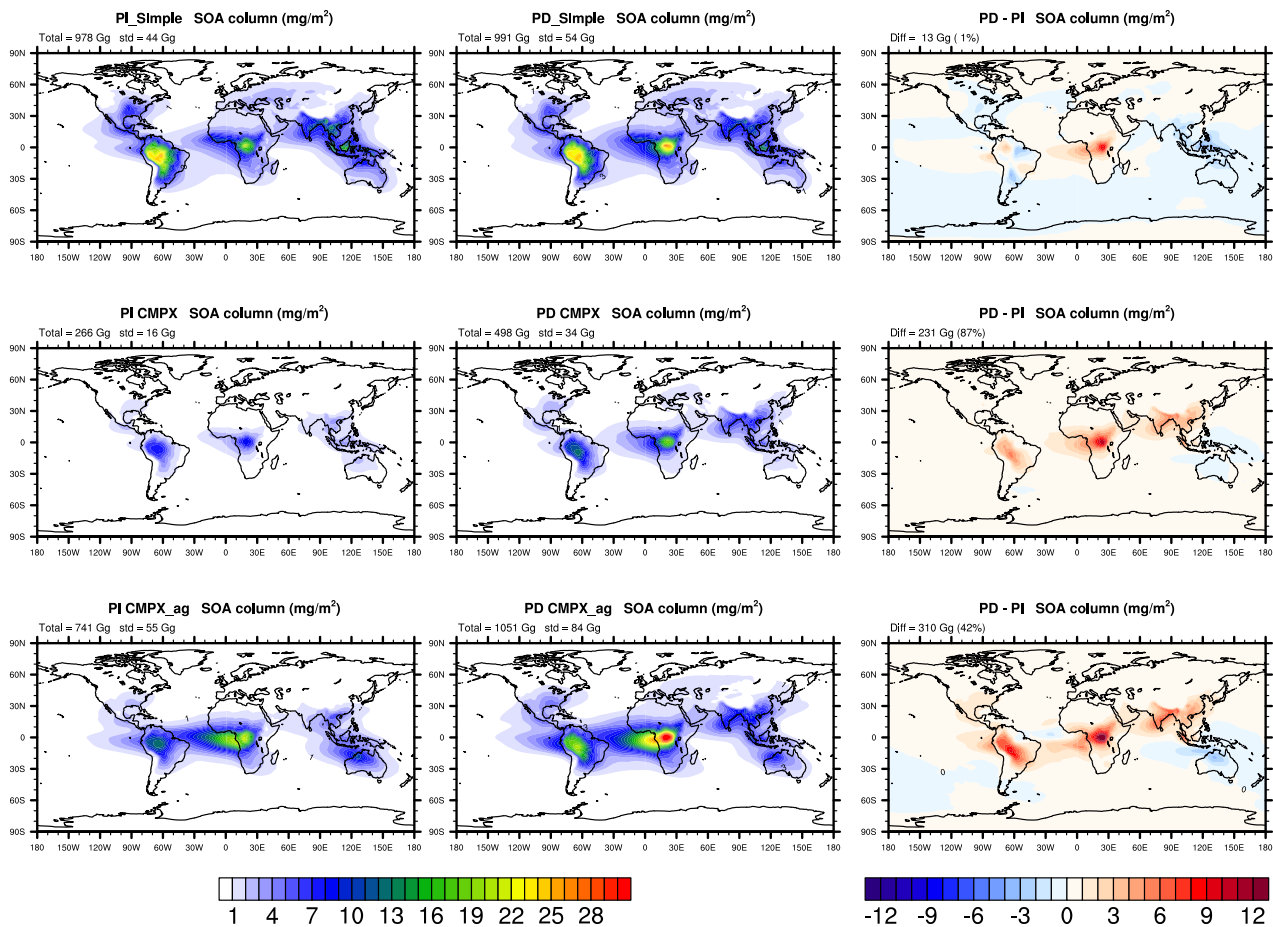

**Figure S7.** Annual mean SOA column concentration (mg/m<sup>2</sup>) using the Simple, CMPX and CMPX\_ag schemes at pre-industrial (PI) and present day (PD) and their difference. The global burden (Gg) are listed at the top left of each panel.

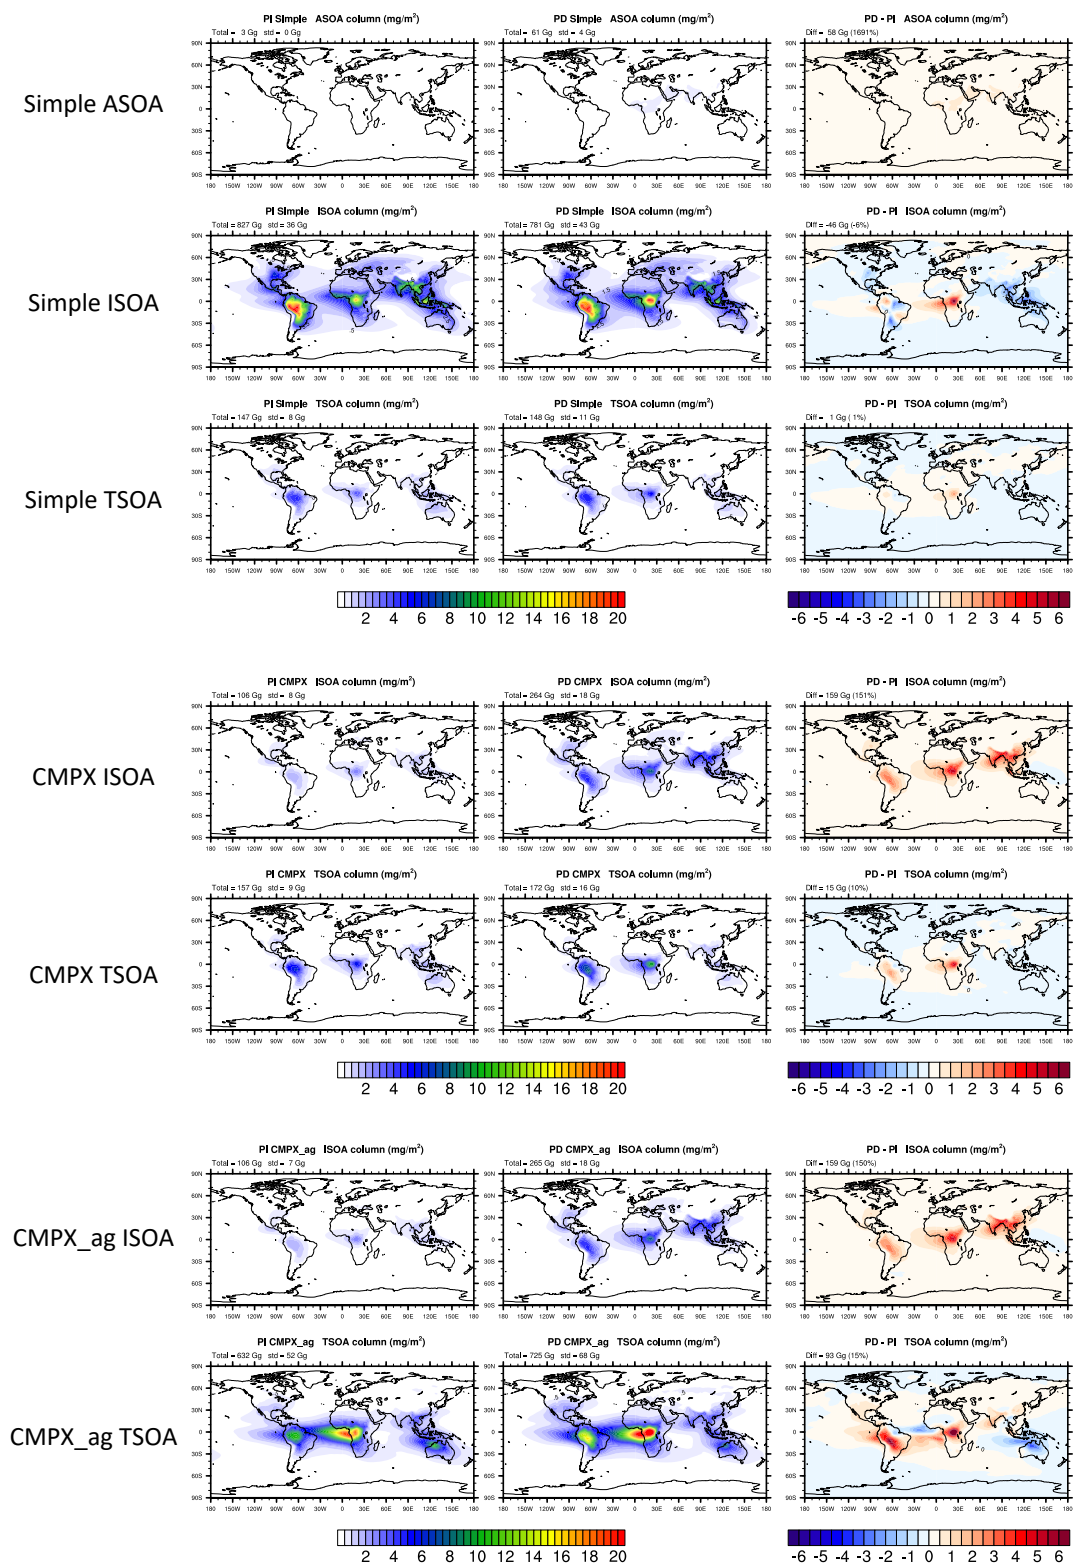

**Figure S8.** Annual mean ASOA, ISOA and TSOA column concentration (mg/m<sup>2</sup>) using the Simple, CMPX and CMPX\_ag schemes at pre-industrial (PI) and present day (PD) and their difference. The global burden (Gg) are listed at the top left of each panel. ASOA is similar among different schemes.

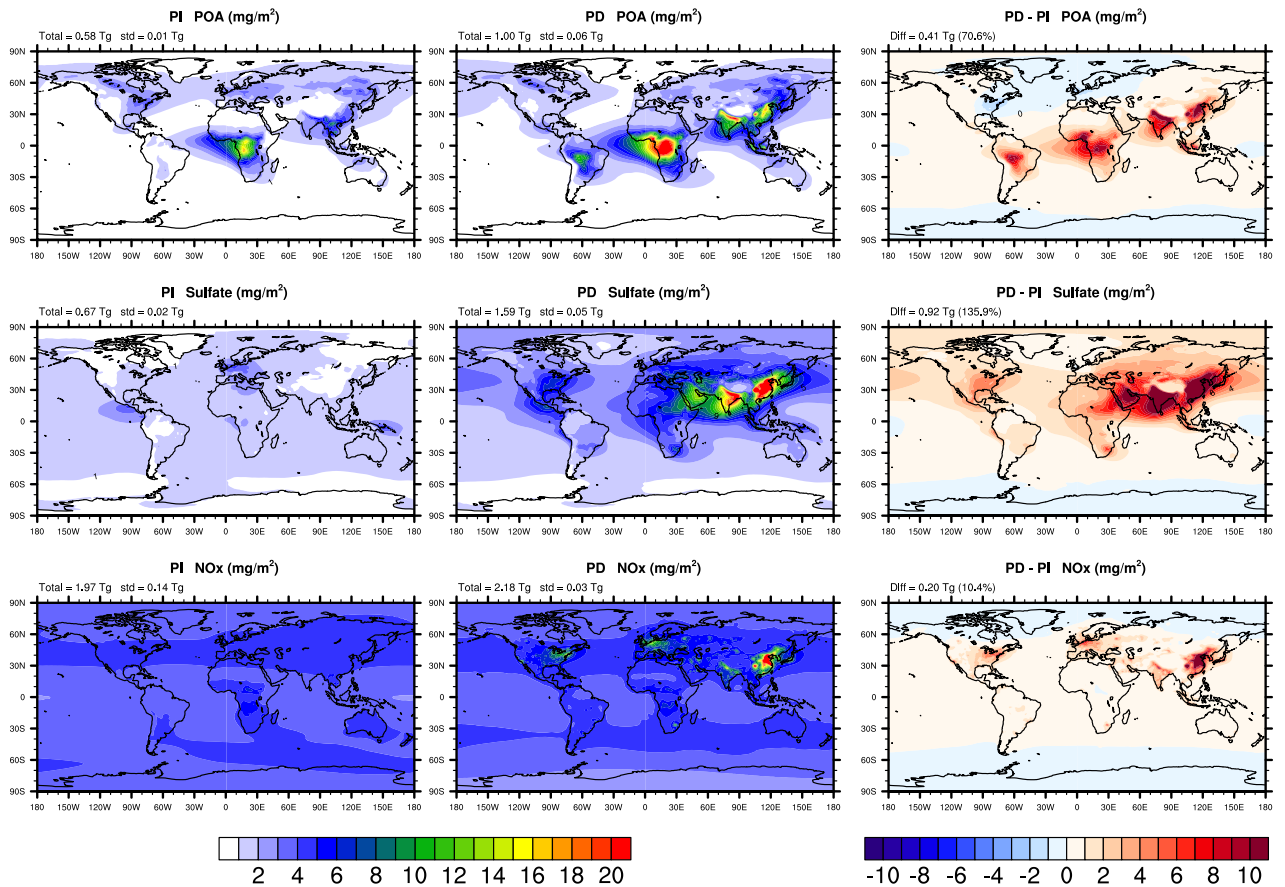

**Figure S9.** Annual average column concentrations (in units of  $\text{mg}/\text{m}^2$ ) of POA, sulfate aerosol and  $\text{NO}_x$  at pre-industrial (left column) and present-day (middle column) and their differences (right column). Their global burdens (in units of Tg) are listed on the top left of each panel.

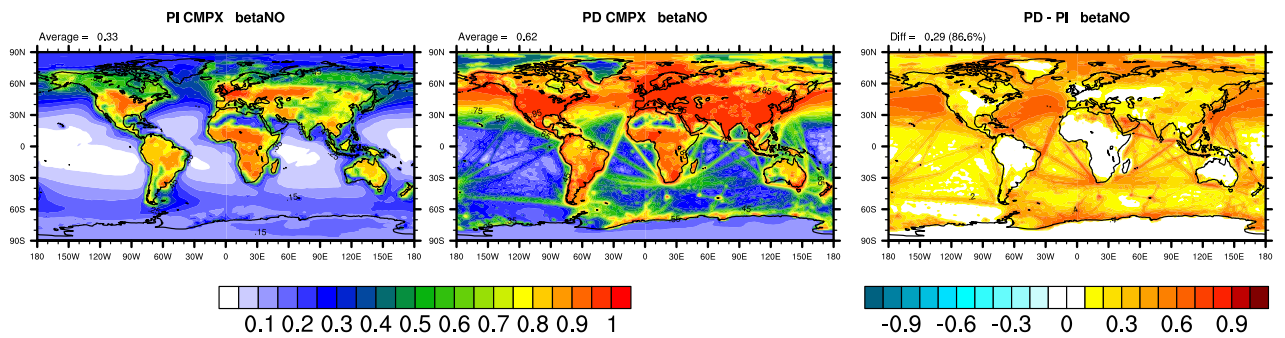

**Figure S10.** Annual mean branching ratio (betaNO) at pre-industrial (left column) and present-day (middle column) and their differences (right column). Their global averages are listed on the top left of each panel.
